# Supplementary material for: Identification of the Essential Brucella melitensis Porin Omp2b as a Suppressor of Bax-Induced Cell Death in Yeast in a Genome-Wide Screening
Source: PubMed Central journal article supplement (PMC2952587; doi:10.1371/journal.pone.0013274), 2010-10-11

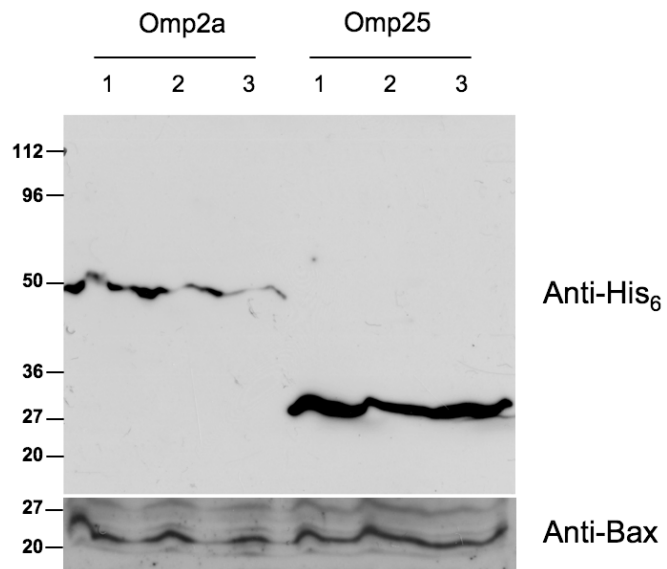

Supplement: pone.0013274.s001.pdf [file pone.0013274.s001.pdf]
