# Supplementary material for: Identification of the Essential Brucella melitensis Porin Omp2b as a Suppressor of Bax-Induced Cell Death in Yeast in a Genome-Wide Screening
Source: PubMed Central journal article supplement (PMC2952587; doi:10.1371/journal.pone.0013274), 2010-10-11
Supplement: pone.0013274.s003.pdf [file pone.0013274.s003.pdf]

## Supporting information

**Table S1. Primers used in this study**

| <b>Primer name</b>            | <b>5'-3' Sequence</b>                                |
|-------------------------------|------------------------------------------------------|
| <i>attB1-bcl<sub>XL</sub></i> | GGGGACAAGTTTGTACAAAAAAGCAGGCTATGGTACAGATACTCATCTCT   |
| <i>attB2-bcl<sub>XL</sub></i> | GGGGACCACTTTGTACAAGAAAGCTGGGTTTTTCCGACTGAAGAGTGAGC   |
| <i>t-omp2b-attB1</i>          | GGGGACAAGTTTGTACAAAAAAGCAGGCTCGATGGACGCAATCGTCGCG    |
| <i>t-omp2b-attB2</i>          | GGGGACCACTTTGTACAAGAAAGCTGGGTCCAACGAACGCTGGAAGCG     |
| FWDshortomp2b                 | GGGGACAAGTTTGTACAAAAAAGCAGGCTCGATGAACATCAAGAGCCTTCTC |
| pYES-DEST52_F                 | TAATACGACTCACTATAGGGA                                |
| pYES-DEST52_R                 | TCGAACCACTTTGTACAAGAA                                |
